# Supplementary material for: A micro/mesoporous aluminosilicate: key factors affecting framework crystallization during steam-assisted synthesis and its catalytic property
Source: Royal Society of Chemistry journal article supplement (doi:10.1039/c0jm00513d), 2010-01-01
Supplement: c0jm00513d.pdf [file c0jm00513d.pdf]

## Supplementary Information

### A Micro/mesoporous Aluminosilicate: Key Factors Affecting Framework Crystallization during Steam-assisted Synthesis and Its Catalytic Property

*Jian Zhou, Zile Hua, Jinjin Zhao, Zhe Gao, Shaozhong Zeng and Jianlin Shi\**

State Key Lab of High Performance Ceramics and Superfine Microstructures, Shanghai Institute  
of Ceramics, Chinese Academy of Sciences, No.1295 Ding-xi Road, Shanghai, 200050, P.R.China

**Table S1.** The experimental parameters of every sample.

| Sample                      | Humidity       | Drying<br>Temperature / °C | Molar ratio of<br>TEA : SiO <sub>2</sub> | Steaming time / h |
|-----------------------------|----------------|----------------------------|------------------------------------------|-------------------|
| c-TUD-1(H <sub>40%</sub> )  | 40%            | 90                         | 1:1                                      | 12                |
| c-TUD-1(H <sub>50%</sub> )  | 50%            | 90                         | 1:1                                      | 12                |
| c-TUD-1(H <sub>100%</sub> ) | 100%           | 90                         | 1:1                                      | 12                |
| c-TUD-1(H <sub>S</sub> )    | Supersaturated | 90                         | 1:1                                      | 12                |
| c-TUD-1(D <sub>80</sub> )   | 100%           | 80                         | 1:1                                      | 12                |
| c-TUD-1(D <sub>90</sub> )   | 100%           | 90                         | 1:1                                      | 12                |
| c-TUD-1(D <sub>100</sub> )  | 100%           | 100                        | 1:1                                      | 12                |
| c-TUD-1(D <sub>120</sub> )  | 100%           | 120                        | 1:1                                      | 12                |
| c-TUD-1(A <sub>0</sub> )    | 100%           | 90                         | 0:1                                      | 12                |
| c-TUD-1(A <sub>0.5</sub> )  | 100%           | 90                         | 0.5:1                                    | 12                |
| c-TUD-1(A <sub>1</sub> )    | 100%           | 90                         | 1:1                                      | 12                |

|                           |      |    |     |    |
|---------------------------|------|----|-----|----|
| c-TUD-1(A <sub>2</sub> )  | 100% | 90 | 2:1 | 12 |
| c-TUD-1(T <sub>3</sub> )  | 100% | 90 | 1:1 | 3  |
| c-TUD-1(T <sub>6</sub> )  | 100% | 90 | 1:1 | 6  |
| c-TUD-1(T <sub>12</sub> ) | 100% | 90 | 1:1 | 12 |
| c-TUD-1(T <sub>24</sub> ) | 100% | 90 | 1:1 | 24 |
| c-TUD-1(T <sub>60</sub> ) | 100% | 90 | 1:1 | 60 |

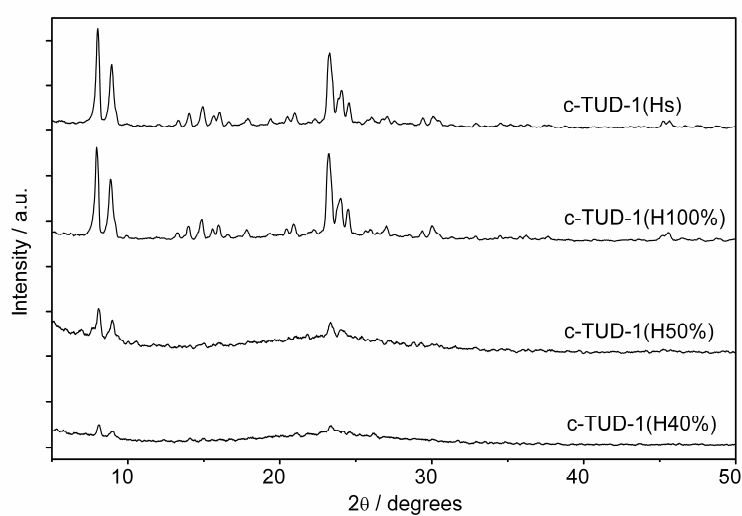

**Fig. S1.** XRD patterns of c-TUD-1(H<sub>n</sub>) series samples prepared by steaming under different humidities.

**Table S2.** Texture properties of samples after steaming under different humidity.

| Sample                      | S <sub>BET</sub> / m <sup>2</sup> g <sup>-1</sup> | S <sub>external</sub> /m <sup>2</sup> g <sup>-1</sup> | V <sub>BJH</sub> /cm <sup>3</sup> g <sup>-1</sup> |
|-----------------------------|---------------------------------------------------|-------------------------------------------------------|---------------------------------------------------|
| c-TUD-1(H <sub>40%</sub> )  | 537                                               | 500                                                   | 0.89                                              |
| c-TUD-1(H <sub>50%</sub> )  | 477                                               | 434                                                   | 0.94                                              |
| c-TUD-1(H <sub>100%</sub> ) | 440                                               | 365                                                   | 0.90                                              |
| c-TUD-1(H <sub>s</sub> )    | 386                                               | 310                                                   | 0.87                                              |

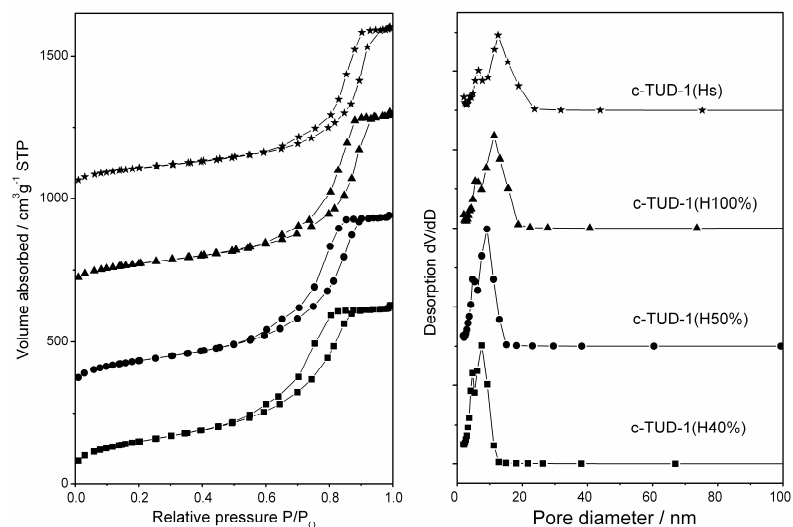

**Fig. S2.**  $N_2$  adsorption/desorption isotherms and their corresponding pore size distributions of c-TUD-1( $H_n$ ) series samples. From bottom to top, the patterns represent samples c-TUD-1( $H_{40\%}$ ) (■),  $H_{50\%}$  (●),  $H_{100\%}$  (▲),  $H_s$  (★), respectively. The curves of samples (a-d) are vertically offset by 200, 650 and 1000  $cm^3 g^{-1}$ , respectively. Pore size distribution is corresponded to the adsorption/desorption isotherms with the same order.

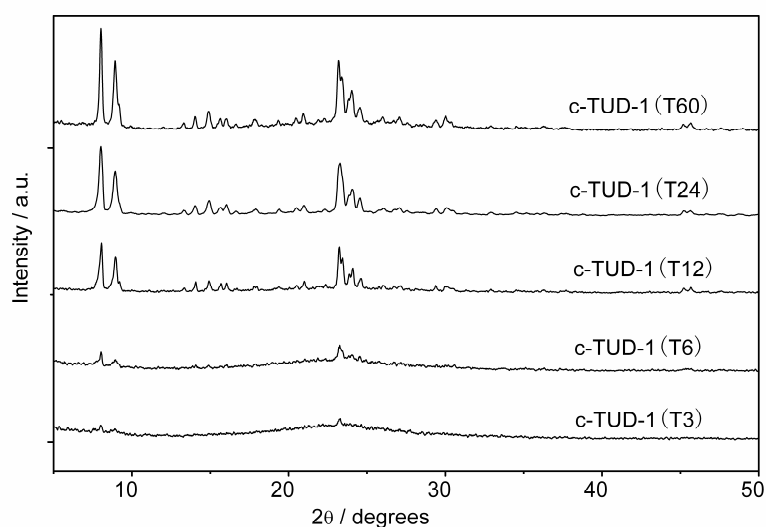

**Fig. S3.** XRD patterns of c-TUD-1( $T_n$ ) series samples prepared by steam-assisted crystallization for different time periods of steaming.

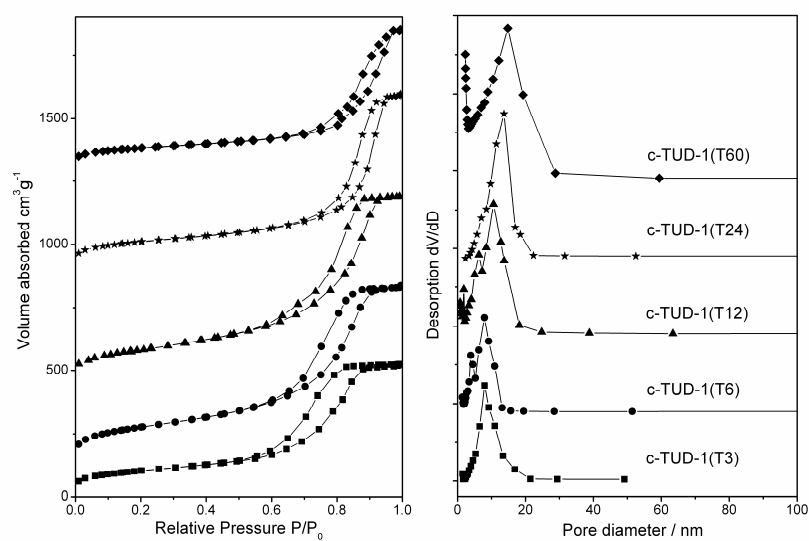

**Figure S4.** N<sub>2</sub> adsorption/desorption isotherms and their corresponding pore size distributions of c-TUD-1(T<sub>n</sub>) series samples. From bottom to top, the patterns represent samples of c-TUD-1(T<sub>3</sub>) (■), c-TUD-1(T<sub>6</sub>) (●), c-TUD-1(T<sub>12</sub>) (▲), c-TUD-1(T<sub>24</sub>) (★) and c-TUD-1(T<sub>60</sub>) (◆), respectively. The curves of samples are vertically offset by 150, 450, 900 and 1300 cm<sup>-3</sup>g<sup>-1</sup>, respectively. Pore size distribution curves are corresponding to the adsorption/desorption isotherms with the same order.
